# Supplementary material for: Dual-pore protocells with multitasking capacities for simultaneous delivery of therapeutic enzymes and drugs in macrophage depletion therapy
Source: Royal Society of Chemistry journal article supplement (doi:10.1039/d4bm00780h), 2024-01-01
Supplement: d4bm00780h1.pdf [file d4bm00780h1.pdf]

## SUPPORTING INFO

### Title

### Dual-pore protocells with multitasking capacities for simultaneous delivery of therapeutic enzymes and drugs in macrophage depletion therapy

Jorge Parra-Nieto,<sup>a</sup> Alicia Arroyo-Nogales,<sup>a</sup> Diana Marcos-Fernández,<sup>a</sup> Sandra Jimenez-Falcao,<sup>a</sup> Carmen Arribas,<sup>a</sup> Diego Megias,<sup>b</sup> África Gonzalez-Murillo,<sup>c</sup> Manuel Ramirez,<sup>c</sup> and Alejandro Baeza,<sup>\*a</sup>

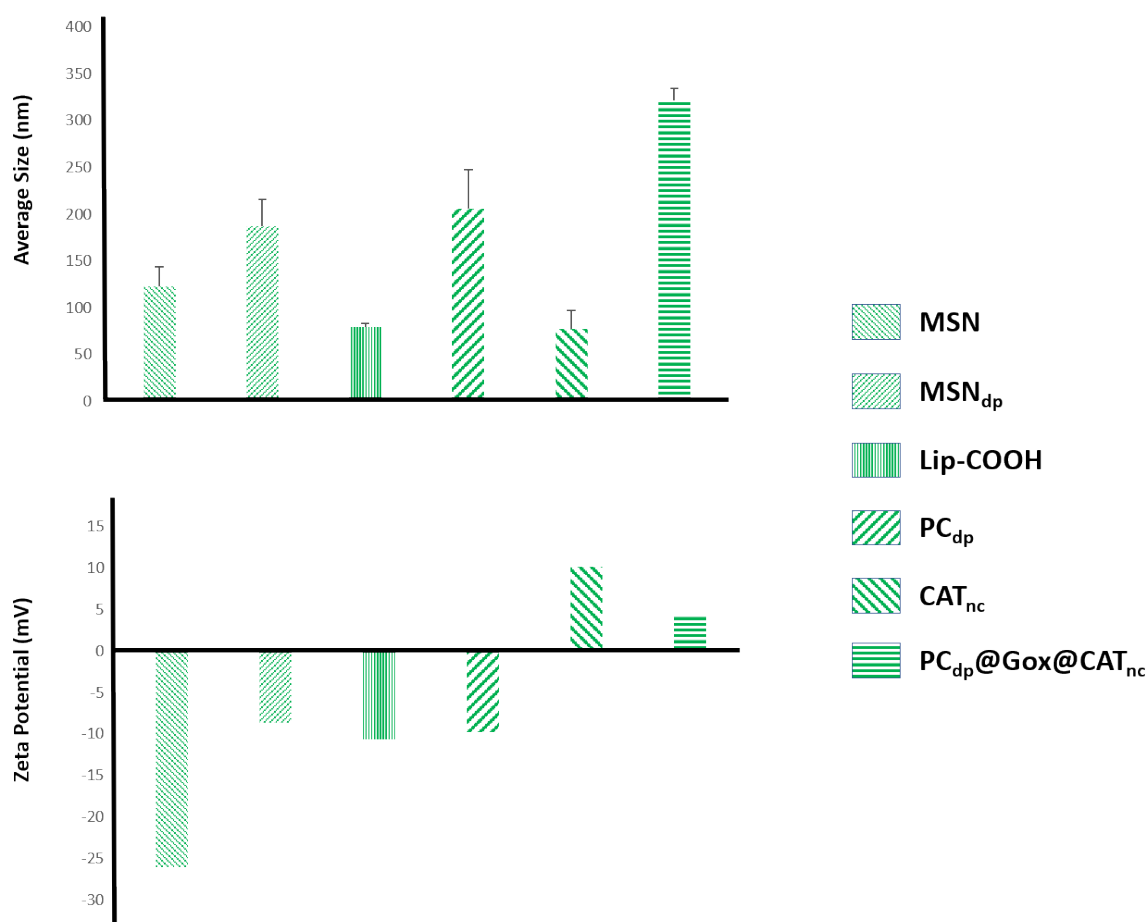

**Figure S1.** Hydrodynamic size measurements by Dynamic Light Scattering (DLS) and Zeta potential.

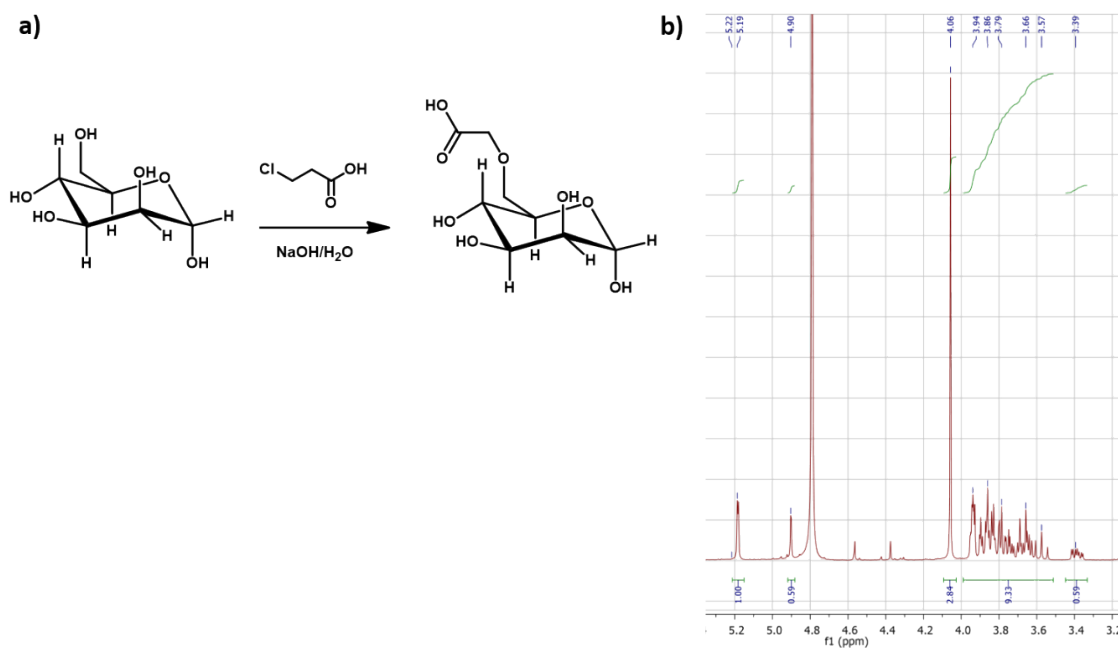

**Figure S2.** a) Synthetic scheme of carboxy-Man. a)  $^1\text{H-NMR}$  spectra of carboxy-Man.

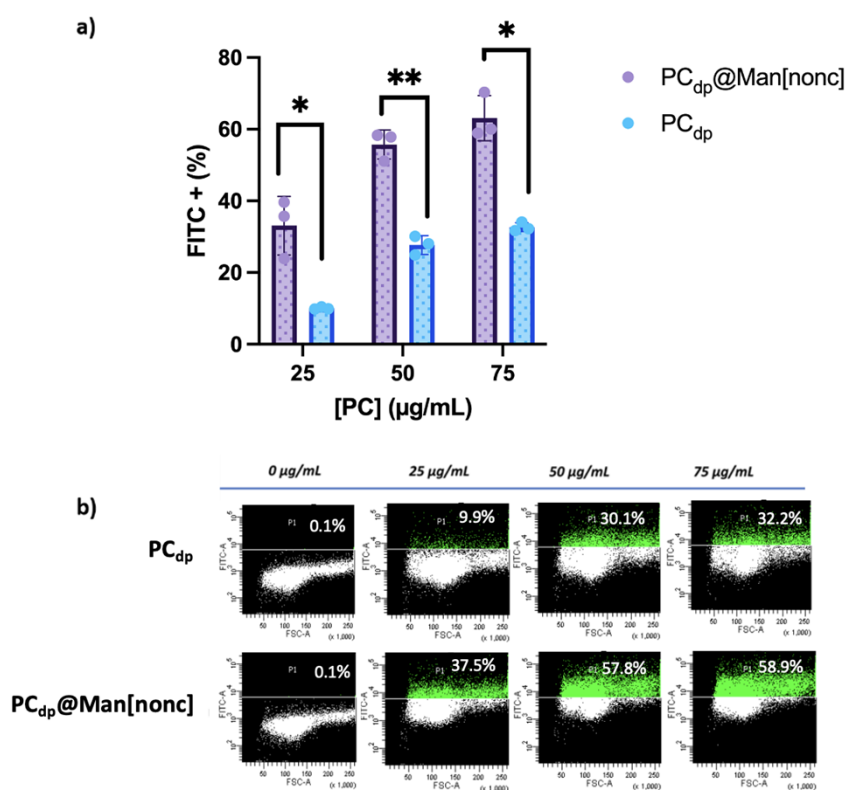

**Figure S3.** a) In vitro protocell uptake evaluation in RAW 264.7 cells treated with PC<sub>dp</sub> and non carboxylated manose modified protocells (PC<sub>dp</sub>@Man[nonc]) at different dosages. All experiments were performed in triplicate and Student t-tests were carried out with \* =  $p < 0.05$ , \*\* =  $p < 0.01$ . b) Flow cytometry of RAW 264.7 cells treated

$$\text{Loading Efficiency} = \frac{\text{Mass of cargo in nanoparticle}}{\text{Mass of cargo used in formulation}} \times 100$$

$$\text{Loading Capacity} = \frac{\text{Mass of cargo in nanoparticle}}{\text{Mass of nanoparticle}} \times 100$$

**Figure S4.** Loading efficiency (LE) and loading capacity (LC) equations.

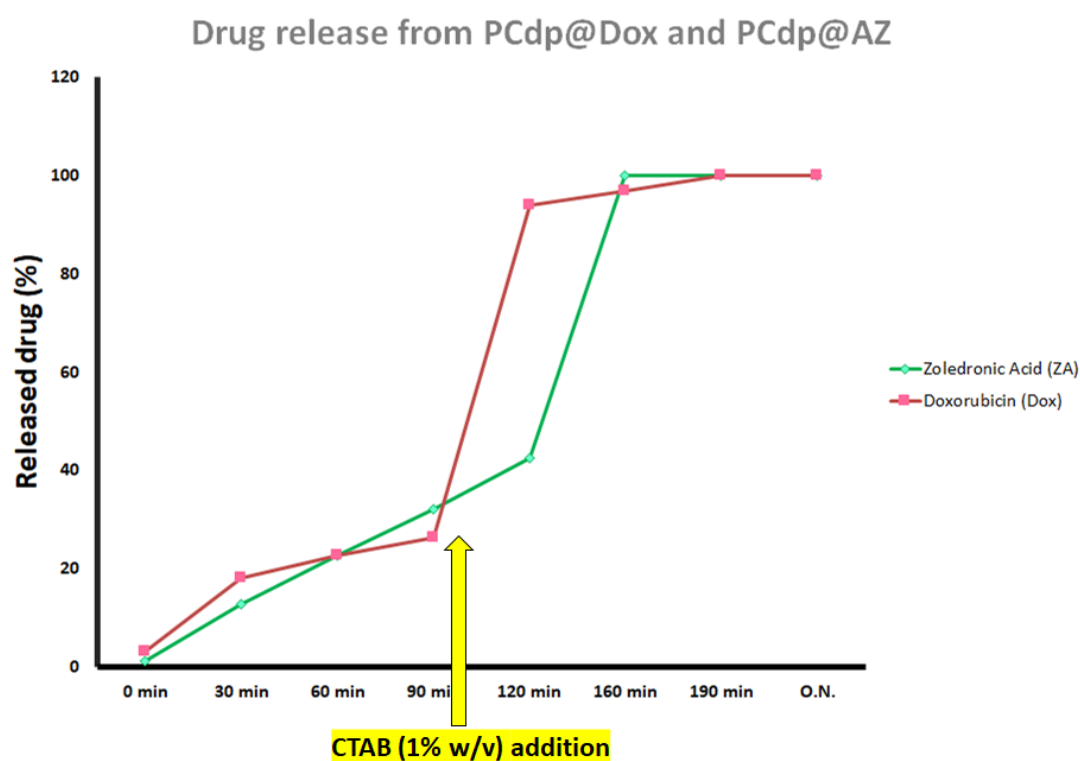

**Figure S5.** ZA and Dox release pattern of PC<sub>dp</sub>@AZ and PC<sub>dp</sub>@DOX suspended in PBS and treated with CTAB.

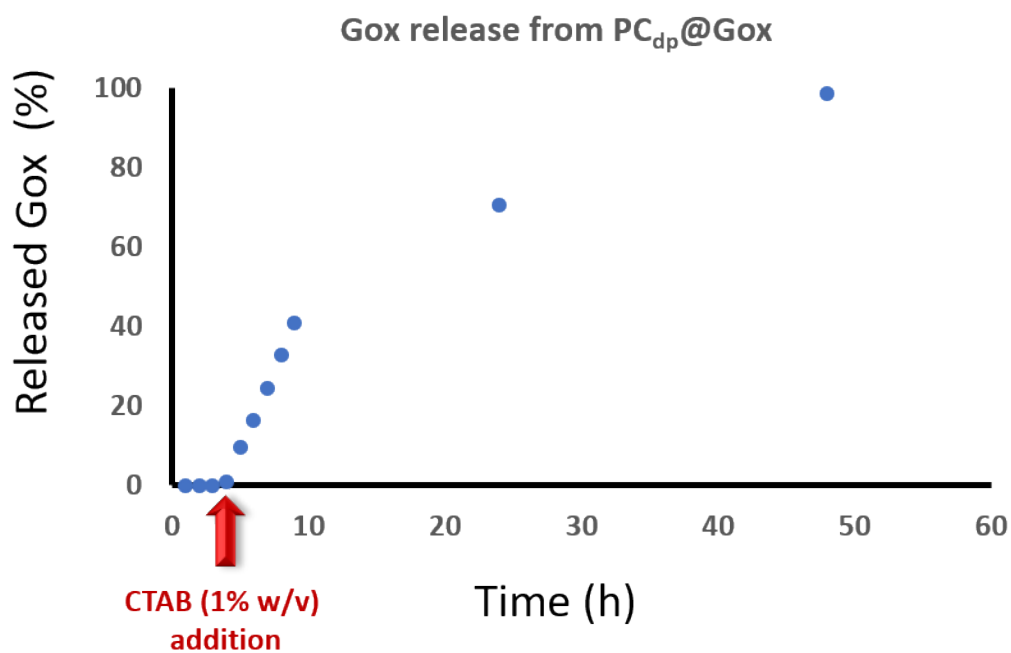

Figure S6. Gox release pattern of PC<sub>dp</sub>@Gox suspended in PBS and treated with CTAB.

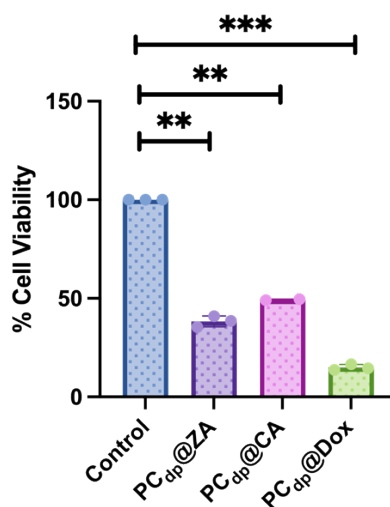

Figure S7. Cell viability evaluation of RAW 264.7 cells incubated with 150 µg/mL of protocells loaded with zoledronic acid (PC<sub>dp</sub>@ZA), chlorogenic acid (PC<sub>dp</sub>@CA) and doxorubicin (PC<sub>dp</sub>@Dox). All experiments were performed in triplicate, and Student t-tests were carried out with \*\* =  $p < 0.01$ ; \*\*\* =  $p < 0.001$ .

**Videos S1** and **S2** show protocell uptake by macrophages under flow conditions.
